# Supplementary material
Source: PubMed Central journal article supplement (PMC3035097)

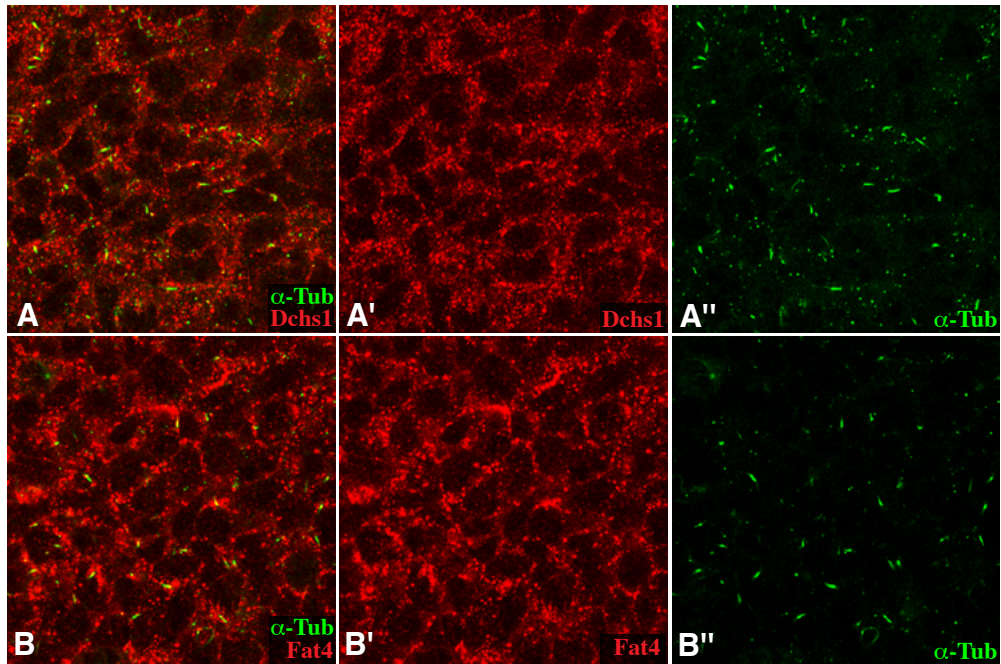

Supplement: supp_138.5.947_DEV057166FigS5.pdf [file supp_138.5.947_DEV057166FigS5.pdf]
